# Supplementary material
Source: ML conference proceedings conference paper supplement (https://proceedings.neurips.cc/paper_files/paper/2023/hash/854a9ab0f323b841955e70ca383b27d1-Abstract.html)
Supplement: Supplementary file 1 [file 854a9ab0f323b841955e70ca383b27d1-Supplemental-Conference.pdf]

# 1 Supplementary Materials for "Directed Cyclic Graph for Causal 2 Discovery from Multivariate Functional Data"

## 3 A Proof of theorem 2.1

*Proof.* For some basis  $\{\phi_{jk}\}_{k=1}^{K_j}$  that spans the low dimensional causal embedded space  $\mathcal{D}_j$ ,  $\alpha_j$  in (5) of the main manuscript can be further expanded by

$$\alpha_j(t_{ju}) = \sum_{k=1}^{K_j} \tilde{\alpha}_{jk} \phi_{jk}(t_{ju})$$

4 Using the above, (5) can then be expressed as,

$$X_{ju} = \sum_{k=1}^{K_j} \tilde{\alpha}_{jk} \phi_{jk}(t_{ju}) + \beta_j(t_{ju}) + e_{ju}, \forall j \in [p], u \in [m_j] \quad (1)$$

5 More compactly, the above (1) can be rewritten as,

$$\mathbf{X} = \Phi(\mathbf{t})\tilde{\boldsymbol{\alpha}} + \boldsymbol{\beta}(\mathbf{t}) + \mathbf{e} \quad (2)$$

where  $\mathbf{X} = (\mathbf{X}_1^\top, \dots, \mathbf{X}_p^\top)^\top$ ,  $\tilde{\boldsymbol{\alpha}} = (\tilde{\boldsymbol{\alpha}}_1^\top, \dots, \tilde{\boldsymbol{\alpha}}_p^\top)^\top$ ,  $\boldsymbol{\beta}(\mathbf{t}) = (\boldsymbol{\beta}_1(t_{j1}), \dots, \boldsymbol{\beta}_p(t_{jp}))^\top$ ,  $\mathbf{e} = (\mathbf{e}_1^\top, \dots, \mathbf{e}_p^\top)^\top$  and  $\Phi(\mathbf{t}) = \text{diag}(\Phi_1(t_{j1}), \dots, \Phi_p(t_{jp}))$  with  $\mathbf{X}_j = (X_{j1}, \dots, X_{jm_j})^\top$ ,  $\tilde{\boldsymbol{\alpha}}_j = (\tilde{\alpha}_{j1}, \dots, \tilde{\alpha}_{jK_j})^\top$ ,  $\boldsymbol{\beta}_j(t_{j1}) = (\beta_j(t_{j1}), \dots, \beta_j(t_{jm_j}))^\top$ ,  $\mathbf{e}_j = (e_{j1}, \dots, e_{jm_j})^\top$  and

$$\Phi_j(t_{j1}) = \begin{pmatrix} \phi_{j1}(t_{j1}) & \phi_{j2}(t_{j1}) & \cdots & \phi_{jK_j}(t_{j1}) \\ \phi_{j1}(t_{j2}) & \phi_{j2}(t_{j2}) & \cdots & \phi_{jK_j}(t_{j2}) \\ \vdots & \vdots & \ddots & \vdots \\ \phi_{j1}(t_{jm_j}) & \phi_{j2}(t_{jm_j}) & \cdots & \phi_{jK_j}(t_{jm_j}) \end{pmatrix}$$

6 The structural equation model is then defined on  $\tilde{\boldsymbol{\alpha}}$  as,

$$\begin{aligned} \tilde{\boldsymbol{\alpha}} &= \mathbf{B}\tilde{\boldsymbol{\alpha}} + \tilde{\boldsymbol{\epsilon}} \\ \Rightarrow \tilde{\boldsymbol{\alpha}} &= \boldsymbol{\Omega}\tilde{\boldsymbol{\epsilon}}, \quad [\text{by Assumption 3}] \end{aligned} \quad (3)$$

7 where  $\boldsymbol{\Omega} = (\mathbf{I} - \mathbf{B})^{-1}$ .

Referring to Assumption 5 of section 2.3 in the main manuscript, we write  $\boldsymbol{\beta}(\mathbf{t}) = \mathbf{C}(\mathbf{t})\boldsymbol{\gamma}$  where

$\boldsymbol{\gamma}_{jk} \sim \sum_{m=1}^{M_{jk}} \pi'_{jkm} N(\mu'_{jkm}, \tau'_{jkm})$  with

$$\mathbf{C} = \begin{pmatrix} \mathbf{C}_{11}(t_1) & \mathbf{0} & \cdots & \mathbf{0} \\ \mathbf{0} & \mathbf{C}_{22}(t_2) & \cdots & \mathbf{0} \\ \vdots & \vdots & \ddots & \vdots \\ \mathbf{0} & \mathbf{0} & \cdots & \mathbf{C}_{pp}(t_p) \end{pmatrix}$$

8 Using this representation for  $\boldsymbol{\beta}(\mathbf{t})$  and (3), (2) boils down to,

$$\mathbf{X} = \Phi(\mathbf{t})\boldsymbol{\Omega}\tilde{\boldsymbol{\epsilon}} + \mathbf{C}(\mathbf{t})\boldsymbol{\gamma} + \mathbf{e} \quad (4)$$

9 From here on let us define  $N = \sum_{j=1}^p m_j$  and  $K = \sum_{j=1}^p K_j$ . We define two class variables  $\boldsymbol{\xi}$   
10 and  $\boldsymbol{\eta}$  such that  $\epsilon_{jk} | \xi_{jk} = m \sim N(\mu_{jkm}, \tau_{jkm})$  and  $\mathbb{P}(\xi_{jk} = m) = \pi_{jkm}$  and  $\gamma_{jk} | \eta_{jk} = m \sim$   
11  $N(\mu'_{jkm}, \tau'_{jkm})$  and  $\mathbb{P}(\eta_{jk} = m) = \pi'_{jkm}$ . Conditioning on these class variables  $\boldsymbol{\xi}$  and  $\boldsymbol{\eta}$ ,

$$\mathbf{X} | \boldsymbol{\xi}, \boldsymbol{\eta} \sim N(\boldsymbol{\mu}_\mathbf{X}, \boldsymbol{\Sigma}_\mathbf{X}) \quad (5)$$

12 where,

$$\begin{aligned} \boldsymbol{\mu}_\mathbf{X} &= \Phi(\mathbf{t})\boldsymbol{\Omega}\boldsymbol{\mu}_\boldsymbol{\xi} + \mathbf{C}(\mathbf{t})\boldsymbol{\mu}_\boldsymbol{\eta} \\ \boldsymbol{\Sigma}_\mathbf{X} &= \Phi(\mathbf{t})\boldsymbol{\Omega}\mathbf{T}_\boldsymbol{\xi}\boldsymbol{\Omega}^\top\Phi(\mathbf{t})^\top + \mathbf{C}(\mathbf{t})\mathbf{T}_\boldsymbol{\eta}\mathbf{C}(\mathbf{t})^\top + \boldsymbol{\Sigma} \end{aligned}$$

13 with  $\boldsymbol{\mu}_\xi = (\boldsymbol{\mu}_{\xi_1}^\top, \dots, \boldsymbol{\mu}_{\xi_p}^\top)^\top$  and  $\boldsymbol{\mu}_\eta = (\boldsymbol{\mu}_{\eta_1}^\top, \dots, \boldsymbol{\mu}_{\eta_p}^\top)^\top$  are the collection of means and  $\mathbf{T}_\xi =$   
14  $\text{diag}(\mathbf{T}_{\xi_1}, \dots, \mathbf{T}_{\xi_p})$  and  $\mathbf{T}_\eta = \text{diag}(\mathbf{T}_{\eta_1}, \dots, \mathbf{T}_{\eta_p})$  are diagonal matrices with variances as diagonal  
15 entries corresponding to the class variable  $\xi$  and  $\eta$ . Here,  $\boldsymbol{\mu}_{\xi_j} = (\mu_{\xi_{j1}}, \dots, \mu_{\xi_{jK_j}})^\top$ ,  $\boldsymbol{\mu}_{\eta_j} =$   
16  $(\mu_{\eta_{j1}}, \dots, \mu_{\eta_{jK_j}})^\top$ ,  $\mathbf{T}_{\xi_j} = \text{diag}(T_{\xi_{j1}}, \dots, T_{\xi_{jK_j}})$  and  $\mathbf{T}_{\eta_j} = \text{diag}(T_{\eta_{j1}}, \dots, T_{\eta_{jK_j}})$  with  $\mu_{\xi_{jk}} =$   
17  $\mu'_{jkm}$  if  $\xi_{jk} = m$  and  $T_{\xi_{jk}} = \tau_{jkm}$  if  $\xi_{jk} = m$  and  $\mu_{\eta_{jk}} = \mu'_{jkm}$  if  $\eta_{jk} = m$  and  $T_{\eta_{jk}} = \tau'_{jkm}$  if  
18  $\eta_{jk} = m$ .  $\boldsymbol{\Sigma}^{N \times N} = \text{diag}(\sigma_1, \dots, \sigma_1, \dots, \sigma_p, \dots, \sigma_p)$ .

19 Our causal identifiability proof necessarily involves **two steps** - First, we shall prove that the  
20 hypergraph like structure which is formed under the assumption of existence of disjoint cycles  
21 (Refer Assumption 2 of the main manuscript) is identifiable. Second, the disjoint cycles inside every  
22 hypernode are identifiable. Please refer to Figure 1 in the main paper for an artistic exposition of the  
23 proof structure.

24 **Step 1.** Now we shall prove the identifiability of our model under the assumption that the SEM  
25 involving  $\tilde{\boldsymbol{\alpha}}$  has an underlying graph in which the cycles are disjoint (Assumption 2). Under this  
26 assumption, we will have cycles of variable length which are connected by directed edges such that  
27 no two cycles in the graph have two nodes that are common to both. This induces a hypergraph like  
28 structure with each disjoint cycle forming a simple directed cycle in  $\mathcal{V}$ .

29 Let us mathematically formalize what we have discussed in the above paragraph. Suppose,  $\mathcal{C} =$   
30  $\{\mathcal{C}_1, \dots, \mathcal{C}_u\}$  where each  $\mathcal{C}_i$  is a simple directed cycle. Clearly,  $\mathcal{V} = \cup_{i=1}^u \mathcal{C}_i$  as  $\mathcal{C}_i$ s form a partition  
31 in  $\mathcal{V}$ . Without loss of generality, let us assume that  $\{\tilde{\boldsymbol{\alpha}}_1, \dots, \tilde{\boldsymbol{\alpha}}_p\}$  be arranged in such a way that the  
32 first  $r_1$  elements form the simple cycle  $\mathcal{C}_1$ , the next  $r_2$  elements form another simple cycle  $\mathcal{C}_2$  and  
33 so on such that  $\sum_{i=0}^u r_i = p$  with  $r_0 = 0$  and  $\mathcal{C}_i = \{\tilde{\boldsymbol{\alpha}}_{r_{i-1}+1}, \dots, \tilde{\boldsymbol{\alpha}}_{r_i}\}$ . We denote the hypergraph  
34 formed by  $\mathcal{C}$  by  $\tilde{\mathcal{G}}$ .

35 Let  $\tilde{\mathcal{G}}$  and  $\tilde{\mathcal{G}}'$  be two graphs where  $\tilde{\mathcal{G}}' \neq \tilde{\mathcal{G}}$ . We can assume a topological ordering in  $\tilde{\mathcal{G}}$  in a sense  
36 that if  $\mathcal{C}_q \rightarrow \mathcal{C}_r$  then  $q < r$ . Therefore, the  $\mathbf{B}$  induced by the graph  $\tilde{\mathcal{G}}$  is necessarily a lower block  
37 triangular matrix with block  $\mathbf{0}$  as the diagonal entries. We cannot say any such thing about the matrix  
38  $\mathbf{B}'$  induced by the graph  $\tilde{\mathcal{G}}'$  except that having block  $\mathbf{0}$  matrices as it's diagonal elements.

39 Let  $\mathbb{P}$  and  $\mathbb{P}'$  be the joint probability distribution of  $\mathbf{X}$  associated with the two graphs  $\tilde{\mathcal{G}}$  and  $\tilde{\mathcal{G}}'$   
40 respectively. Let  $\mathcal{S} = (\tilde{\mathcal{G}}, \mathbb{P})$  and  $\mathcal{S}' = (\tilde{\mathcal{G}}', \mathbb{P}')$ . We shall prove by contradiction that  $\mathcal{S}$  and  $\mathcal{S}'$  are  
41 not equivalent.

42 Suppose,  $\mathbb{P}(\mathbf{X}) \equiv \mathbb{P}'(\mathbf{X})$ . Then due to the identifiability of finite Gaussian mixture models up to  
43 label permutation [Teicher, 1963, Yakowitz and Spragins, 1968], we must have, for any  $\xi, \eta$ ,

$$\boldsymbol{\Phi}(t)\boldsymbol{\Omega}\mathbf{T}_\xi\boldsymbol{\Omega}^\top\boldsymbol{\Phi}(t)^\top + \mathbf{C}(t)\mathbf{T}_\eta\mathbf{C}(t)^\top + \boldsymbol{\Sigma} = \boldsymbol{\Phi}(t)\boldsymbol{\Omega}'\mathbf{T}'_\xi\boldsymbol{\Omega}'^\top\boldsymbol{\Phi}(t)^\top + \mathbf{C}(t)\mathbf{T}'_\eta\mathbf{C}(t)^\top + \boldsymbol{\Sigma}' \quad (6)$$

44 For some choice of  $\tilde{\xi} \neq \xi$  and  $\tilde{\eta} = \eta$ , we can write from (6),

$$\begin{aligned} \boldsymbol{\Phi}(t)\boldsymbol{\Omega}(\mathbf{T}_\xi - \mathbf{T}_{\tilde{\xi}})\boldsymbol{\Omega}^\top\boldsymbol{\Phi}(t)^\top &= \boldsymbol{\Phi}(t)\boldsymbol{\Omega}'(\mathbf{T}'_\xi - \mathbf{T}'_{\tilde{\xi}})\boldsymbol{\Omega}'^\top\boldsymbol{\Phi}(t)^\top \\ &\Rightarrow \boldsymbol{\Omega}(\mathbf{T}_\xi - \mathbf{T}_{\tilde{\xi}})\boldsymbol{\Omega}^\top = \boldsymbol{\Omega}'(\mathbf{T}'_\xi - \mathbf{T}'_{\tilde{\xi}})\boldsymbol{\Omega}'^\top, \text{ (using Assumption 6)} \end{aligned} \quad (7)$$

45 Notice that  $\boldsymbol{\Omega}$  being an invertible matrix, every row of every block diagonal matrices must have at  
46 least a non zero element.  $\boldsymbol{\Omega}_{K,\cdot}$  denotes the last row for  $\boldsymbol{\Omega}$  and  $l_1$  be the extreme position for which  
47  $\boldsymbol{\Omega}_{K,l_1} \neq 0$ . Pick  $\tilde{\xi}$  above such that  $\tilde{\xi} = \xi$  except for that  $l_1$ th element such that  $(\mathbf{T}_\xi - \mathbf{T}_{\tilde{\xi}})_{l_1,l_1} \neq$   
48  $0$ . Hence the matrix  $(\mathbf{T}_\xi - \mathbf{T}_{\tilde{\xi}})$  is of rank 1 and from (7) it implies that  $\exists s_1 \in [K]$  such that  
49  $(\mathbf{T}'_\xi - \mathbf{T}'_{\tilde{\xi}})_{s_1,s_1} \neq 0$ . Therefore clearly,

$$0 \neq \boldsymbol{\Omega}_{K,\cdot}(\mathbf{T}_\xi - \mathbf{T}_{\tilde{\xi}})\boldsymbol{\Omega}_{K,\cdot}^\top = \boldsymbol{\Omega}'_{K,\cdot}(\mathbf{T}'_\xi - \mathbf{T}'_{\tilde{\xi}})\boldsymbol{\Omega}'_{K,\cdot}^\top = \boldsymbol{\Omega}'_{K,s_1}{}^2(\mathbf{T}'_\xi - \mathbf{T}'_{\tilde{\xi}})_{s_1,s_1} \quad (8)$$

50 Now as  $(\mathbf{T}'_\xi - \mathbf{T}'_{\tilde{\xi}})_{s_1,s_1} \neq 0$ , we have from (8),  $\boldsymbol{\Omega}'_{K,s_1} \neq 0$ . Similarly, if we now focus on the  
51  $(K-1)$ th row of  $\boldsymbol{\Omega}$ , there can be two cases,

52 **Case 1:** The last position for which  $\boldsymbol{\Omega}_{K-1,\cdot} \neq 0$  coincides with  $l_1$ . Then for this, we shall proceed  
53 with the same choice of  $\tilde{\xi}$  as above and with the same argument from above we can show that  
54  $\boldsymbol{\Omega}'_{K-1,s_1} \neq 0$

55 **Case 2:** If the position of the last non zero element in the  $(K-1)$ th row of  $\Omega$  is some  $l_2 (\neq l_1)$ ,  
 56 we pick  $\tilde{\xi}$  such that  $\tilde{\xi} = \xi$  except for that  $l_2$ th element such that  $(\mathbf{T}_\xi - \mathbf{T}_{\tilde{\xi}})_{l_2, l_2} \neq 0$ . Hence the  
 57 matrix  $(\mathbf{T}_\xi - \mathbf{T}_{\tilde{\xi}})$  is of rank 1 and from (7) it implies that  $\exists s_2 \in [K]$  such that  $(\mathbf{T}'_\xi - \mathbf{T}'_{\tilde{\xi}})_{s_2, s_2} \neq 0$ .  
 58 Therefore clearly,

$$0 \neq \Omega_{K-1, \cdot} (\mathbf{T}_\xi - \mathbf{T}_{\tilde{\xi}}) \Omega_{K-1, \cdot}^T = \Omega'_{K-1, \cdot} (\mathbf{T}'_\xi - \mathbf{T}'_{\tilde{\xi}}) \Omega_{K-1, \cdot}^{\top} = \Omega'^2_{K-1, s_2} (\mathbf{T}'_\xi - \mathbf{T}'_{\tilde{\xi}})_{s_2, s_2} \quad (9)$$

59 Similarly as before since  $(\mathbf{T}'_\xi - \mathbf{T}'_{\tilde{\xi}})_{s_2, s_2} \neq 0$ , we have from (9),  $\Omega'_{K-1, s_2} \neq 0$ . Define  $K_{|C_u|} =$   
 60  $\sum_{j=r_{i-1}+1}^{r_i} K_j$ . Clearly,  $\sum_{i=1}^u \sum_{j=r_{i-1}+1}^{r_i} K_j = K$ . Therefore, proceeding similarly from above  
 61 we can show that  $\Omega'_{K-K_{|C_u|}+1, s_{K_{|C_u|}}} \neq 0$ .

62 Now since  $\Omega$  is a lower block triangular matrix, we have  $\forall r \leq K - K_{|C_u|}, \Omega_{r, (K-K_{|C_u|}+1):K} = 0$ .  
 63 Therefore, if we pick some  $\tilde{\xi}$  which does not match  $\xi$  at the  $l_j$ th position,  $l_j > K - K_{|C_u|}, j \in [K_{|C_u|}]$   
 64 such that  $(\mathbf{T}_\xi - \mathbf{T}_{\tilde{\xi}})_{l_j, l_j} \neq 0$  then there will exist some  $s_j \in [K]$  such that  $(\mathbf{T}'_\xi - \mathbf{T}'_{\tilde{\xi}})_{s_j, s_j} \neq 0, j \in$   
 65  $[K_{|C_u|}]$ . Therefore we have,

$$0 = \Omega_{r, \cdot} (\mathbf{T}_\xi - \mathbf{T}_{\tilde{\xi}}) \Omega_{r, \cdot}^T = \Omega'_{r, \cdot} (\mathbf{T}'_\xi - \mathbf{T}'_{\tilde{\xi}}) \Omega_{r, \cdot}^{\top} = \Omega'^2_{r, s_j} (\mathbf{T}'_\xi - \mathbf{T}'_{\tilde{\xi}})_{s_j, s_j} \quad (10)$$

66 From (10), as  $(\mathbf{T}'_\xi - \mathbf{T}'_{\tilde{\xi}})_{s_j, s_j} \neq 0$ , we have,  $\Omega'_{r, s_j} = 0, \forall r \leq K - K_{|C_u|}, j \in [K_{|C_u|}]$ .

67 Proceeding similarly from above, if we repeat the above set of arguments for all the rows of  $\Omega$   
 68 matrix, we can observe that  $\Omega'$  is just a block column permutation of a lower block triangular matrix.  
 69 Therefore there exists a block lower triangular matrix  $\mathbf{A}$  and a block permutation matrix  $\mathbf{P}$  such that,

$$\begin{aligned} \Omega' &= \mathbf{A}\mathbf{P} \\ \Rightarrow (\mathbf{I} - \mathbf{B}')^{-1} &= \mathbf{A}\mathbf{P} \\ \Rightarrow (\mathbf{I} - \mathbf{B}') &= \mathbf{P}^{\top} \mathbf{A}^{-1} \end{aligned} \quad (11)$$

70 Now, the RHS of (11) is just a row permuted block lower triangular matrix. Therefore, the permutation  
 71 matrix  $\mathbf{P}$  has to be the identity matrix; otherwise  $\mathbf{P}^{\top} \mathbf{A}^{-1}$  must have zeros in its diagonal but  $\mathbf{I} - \mathbf{B}'$   
 72 has unit diagonal because  $\mathbf{B}'$  has zero diagonal (no self-loop). Hence we arrive at a contradiction  
 73 and conclude from here that  $\mathcal{S}$  and  $\mathcal{S}'$  are not equivalent, i.e.  $\mathbb{P}(\mathbf{X}) \neq \mathbb{P}'(\mathbf{X})$ .

74 **Step 2.** We now try to prove that each simple directed cycle is identifiable.

75 If  $\mathbf{H}$  and  $\mathbf{H}'$  are the sub-matrices induced by some  $\mathcal{C}_j \in \mathcal{C}, j \in [u]$  in  $\bar{\mathcal{G}}$  and  $\bar{\mathcal{G}}'$  respectively then it  
 76 is sufficient to show that for any permutation matrix  $\mathbf{P}, \mathbf{P}(\mathbf{I} - \mathbf{H}) = \mathbf{I} - \mathbf{H}' \Rightarrow \mathbf{P} = \mathbf{I}$ .

77 Now since  $\mathbf{H}$  is a matrix for a simple cycle, it can be written as  $\mathbf{H} = \mathbf{Q}\mathbf{D}$  where  $\mathbf{Q}$  is a permutation  
 78 matrix and  $\mathbf{D}$  is block diagonal matrix. Now,

$$\begin{aligned} \mathbf{P}(\mathbf{I} - \mathbf{H}) &= \mathbf{I} - \mathbf{H}' \\ \Rightarrow \mathbf{P}(\mathbf{I} - \mathbf{Q}\mathbf{D}) &= \mathbf{I} - \mathbf{H}' \\ \Rightarrow \mathbf{P} - \mathbf{P}\mathbf{Q}\mathbf{D} &= \mathbf{I} - \mathbf{H}' \end{aligned} \quad (12)$$

79 The RHS of (12) has all 1's in it's diagonal. Therefore the diagonal elements of  $\mathbf{P}$  and  $\mathbf{P}\mathbf{Q}$  i.e.  
 80  $(\mathbf{P})_{i,i}$  and  $(\mathbf{P}\mathbf{Q})_{i,i}$  cannot be simultaneously 0.

81 **Case 1:**  $(\mathbf{P})_{i,i} \neq 1$  for some  $i$ .

82 Without loss of generality let,  $\mathbf{P} = \begin{pmatrix} \mathbf{P}_1 & \mathbf{0} \\ \mathbf{0} & \mathbf{I} \end{pmatrix}$  where  $\mathbf{P}_1$  is the matrix that has 0 in it's diagonal.

83 Clearly,  $\mathbf{P}_1 = (\mathbf{I} \ \mathbf{0}) \mathbf{P} \begin{pmatrix} \mathbf{I} \\ \mathbf{0} \end{pmatrix}$ . Now from (12),

$$\begin{aligned}
(I \ 0)(P - PQD) \begin{pmatrix} I \\ 0 \end{pmatrix} &= (I \ 0)(I - H') \begin{pmatrix} I \\ 0 \end{pmatrix} \\
\Rightarrow P_1 - (P_1 \ 0)Q \begin{pmatrix} D_1 \\ 0 \end{pmatrix} &= I - (I \ 0)H' \begin{pmatrix} I \\ 0 \end{pmatrix} \\
\Rightarrow P_1 - P_1Q_{11}D_1 &= I - H'_{11}
\end{aligned} \tag{13}$$

Notice that, the diagonals of RHS of (13) are equal to 1,  $Q_{11}$  is not necessarily a permutation matrix but it has at most one 1 in every column and  $P_1$  is a permutation matrix. Following from the same argument as before, we can therefore say that the diagonals of  $P_1$  and  $P_1Q_{11}$  cannot be simultaneously 0. Now from our assumption since  $(P_1)_{i,i} = 0, \forall i$  we have,

$$(P_1Q_{11})_{i,i} = 1, \forall i$$

84 Now since  $P_1$  is a permutation matrix and  $Q_{11}$  has at most one 1 in every column, we have  
85  $P_1Q_{11} = I$  and  $D_1 = -I$  Therefore, from above we obtain,

$$\begin{aligned}
I + P_1 &= I - H'_{11} \\
\Rightarrow P_1 &= -H'_{11}
\end{aligned} \tag{14}$$

86 Let any eigenvalue of matrix  $A$  be denoted by  $\lambda(A)$ . Therefore from (14), we can obtain,

$$\begin{aligned}
\lambda(P_1) &= \lambda(-H'_{11}) \\
\Rightarrow \lambda(P_1) &= -\lambda(H'_{11}), (\because -\lambda \text{ is an eigenvalue for } H_{11}) \\
\Rightarrow |\lambda(P_1)| &= |\lambda(H'_{11})|, (\text{taking modulus on both sides})
\end{aligned}$$

87 Now since  $P_1$  is a permutation matrix, all of it's eigenvalues lie on a unit circle, i.e.  $|\lambda(P_1)| = 1$ .  
88 But according to Assumption 3 of the main manuscript, the moduli of the eigenvalues of  $H'$  and  
89 hence  $H'_{11}$  are less than 1 and none of the real eigenvalues are equal to 1. Therefore, we arrive at a  
90 contradiction.

91 **Case 2:**  $(P)_{i,i} = 0 \forall i$

Therefore,  $(PQ)_{i,i} = 1 \forall i$  and  $D = -I$ . Therefore from (12), we obtain,

$$P + I = I - H'$$

Proceeding similarly from the case 1 argument, we arrive at a contradiction.

$$\therefore P = I$$

92

□

## 93 B Posterior inference

### 94 B.1 Selecting the effective number of basis functions for the causal embedded space

95 While it is possible to use a prior to learn the number of basis functions jointly with other parameters  
96 through reversible jump MCMC or to use shrinkage priors to adaptively truncate and eliminate  
97 redundant functions, these approaches can lead to significant computational burden and potential  
98 Markov chain mixing issues. Therefore, this article employs a simple heuristic approach, as described  
99 in Kowal et al., 2017, Zhou et al., 2022. First, the functional observations are imputed and arranged  
100 into a  $(n \times p) \times d$  matrix, where  $d = |\cup_{i,j} \mathcal{T}_j^{(i)}|$  represents the size of the union of the measurement  
101 grid over all realized random functions. Then, singular value decomposition is performed, and the  
102 minimum value of  $K$  is selected such that its proportion of variance explained is at least 90%. This  
103 value is fixed throughout MCMC. It should be noted that while  $K$  remains fixed, the basis functions  
104 are adaptively inferred.

105 We have noted that the value of  $K$  derived from the aforementioned heuristic method falls  
106 within a range of  $\pm 2$  in comparison to the value obtained by fixing a grid encompassing values  
107  $\{1, 2, 3, 4, 5, 6, 7\}$  for  $K$  and subsequently selecting the  $K$  associated with the lowest WAIC [Watanabe, 2013]. The graph recovery performance, as assessed by Matthew's correlation coefficient (MCC)  
108 using this method, closely aligns with that of the previous approach. Consequently, we adopted  
109 the aforementioned heuristic technique to determine the optimal number of basis functions that  
110 collectively span the causal embedded space.  
111

112 **B.2 Posterior distributions**

113 While the closed form expression for the posterior distribution cannot be obtained, we resort to MCMC  
 114 techniques for sampling. We use superscript  $(\cdot)$  to denote observations throughout the text. Let  
 115  $\mathbf{X}^{(1)}, \dots, \mathbf{X}^{(n)}$  be  $n$  realizations of the multivariate random functions  $\mathbf{X}$ . For the mixture of Gaus-  
 116 sian distribution we assume  $M_{jk} = M$  for simplicity. In order to obtain updates for the parameters of  
 117 the mixture distribution, we define a class variable  $\xi^{(i)} = (\xi_1^{(i)\top}, \dots, \xi_p^{(i)\top}, \bar{\xi}_1^{(i)\top}, \dots, \bar{\xi}_p^{(i)\top})^\top$   
 118 with  $\xi_j^{(i)} = (\xi_{j1}^{(i)}, \dots, \xi_{jK_j}^{(i)})^\top$  and  $\bar{\xi}_j^{(i)} = (\xi_{j,K_j+1}^{(i)}, \dots, \xi_{jS}^{(i)})^\top$  where  $\xi_{jk}^{(i)} = m$  if  $\tilde{\epsilon}_{jk}^{(i)}$  be-  
 119 longs to the mixture component  $m$ . Let  $\mathbf{M}^{(i)} = (\boldsymbol{\mu}_1^{(i)\top}, \dots, \boldsymbol{\mu}_p^{(i)\top}, \bar{\boldsymbol{\mu}}_1^{(i)\top}, \dots, \bar{\boldsymbol{\mu}}_p^{(i)\top})^\top$  and  
 120  $\mathbf{T}^{(i)} = \text{diag}(\boldsymbol{\tau}_1^{(i)}, \dots, \boldsymbol{\tau}_p^{(i)}, \bar{\boldsymbol{\tau}}_1^{(i)}, \dots, \bar{\boldsymbol{\tau}}_p^{(i)})$  be the mean and covariance matrix of  $\epsilon^{(i)}$  where  
 121  $\boldsymbol{\mu}_j^{(i)} = (\mu_{j1}^{(i)}, \dots, \mu_{jK_j}^{(i)})^\top$ ,  $\bar{\boldsymbol{\mu}}_j^{(i)} = (\mu_{j,K_j+1}^{(i)}, \dots, \mu_{jS}^{(i)})^\top$ ,  $\boldsymbol{\tau}_j^{(i)} = (\tau_{j1}^{(i)}, \dots, \tau_{jS}^{(i)})^\top$  and  $\bar{\boldsymbol{\tau}}_j^{(i)} =$   
 122  $(\tau_{j,K_j+1}^{(i)}, \dots, \tau_{jS}^{(i)})^\top$  with  $\mu_{jkm}^{(i)} = \sum_{m=1}^M \mu_{jkm} \mathbf{1}(\xi_{jk}^{(i)} = m)$  and  $\tau_{jkm}^{(i)} = \sum_{m=1}^M \tau_{jkm} \mathbf{1}(\xi_{jk}^{(i)} = m)$ .  
 123 Define  $\boldsymbol{\pi}_{jk} = (\pi_{jk1}, \dots, \pi_{jkm})^\top, \forall j \in [p], k \in [S]$ . Let  $\tilde{\epsilon}^{(i)} = \tilde{\boldsymbol{\alpha}}^{(i)} - \tilde{\mathbf{B}}\tilde{\boldsymbol{\alpha}}^{(i)}$  be the vector of  
 124 exogenous variables for the  $i^{\text{th}}$  observation.

125 **Posterior distribution of the parameters of the mixture distribution.** For each  $j \in [p], k \in$   
 126  $[S]$ , update the mixture weights  $\boldsymbol{\pi}_{jk}$  by drawing from a Dirichlet distribution with concentration  
 127 parameters  $\{\beta_m\}_{m \in [M]}$  where,

$$\beta_m = \alpha + \sum_{i=1}^n \mathbf{1}(\xi_{jk}^{(i)} = m) \quad (15)$$

128 Now, given the  $\boldsymbol{\pi}_{jk}$ 's, for each  $i \in [n], j \in [p], k \in [S]$ , update the class variables  $\xi_{jk}^{(i)}$  from a  
 129 categorical distribution with class probability  $\{\pi_m^{(i)}\}_{m \in [M]}$  where,  $\pi_m^{(i)} \propto \pi_{jkm} \mathbf{N}(\tilde{\epsilon}_{jk}^{(i)}; \mu_{jkm}, \tau_{jkm})$   
 130 with  $\sum_{m=1}^M \pi_m^{(i)} = 1$ .

$$\pi_m^{(i)} \propto \pi_{jkm} \mathbf{N}(\tilde{\epsilon}_{jk}^{(i)}; \mu_{jkm}, \tau_{jkm}), \quad \sum_{m=1}^M \pi_m^{(i)} = 1 \quad (16)$$

131 Next, for each  $j \in [p], k \in [S], m \in [M]$  we update the mean parameter  $\mu_{jkm}$  by sampling from a  
 132  $\mathbf{N}(p_{jkm}, q_{jkm}^{-1})$  distribution with,

$$q_{jkm} = \left( 1/b_\mu + \sum_{i=1}^n \mathbf{1}(\xi_{jk}^{(i)} = m) \right)$$

$$p_{jkm} = q_{jkm}^{-1} \left( a_\mu + \sum_{i=1}^n \mathbf{1}(\xi_{jk}^{(i)} = m) \tilde{\epsilon}_{jk}^{(i)} \right) \quad (17)$$

133 The variance parameter  $\tau_{jkm}$  by sampling from a  $\text{IG}(p'_{jkm}, q'_{jkm})$  where,

$$p'_{jkm} = a_\tau + 1/2 \sum_{i=1}^n \mathbf{1}(\xi_{jk}^{(i)} = m)$$

$$q'_{jkm} = b_\tau + 1/2 \sum_{i=1}^n \mathbf{1}(\xi_{jk}^{(i)} = m) (\tilde{\epsilon}_{jk}^{(i)} - \mu_{jkm})^2 \quad (18)$$

134 **Posterior distribution of the orthonormal basis coefficients:** For each  $i \in [n]$ , define  $\mathbf{L}^{(i)} =$   
 135  $(\mathbf{I} - \tilde{\mathbf{B}})^\top \mathbf{T}^{(i)-1} (\mathbf{I} - \tilde{\mathbf{B}})$ ,  $\mathbf{D}_1^{(i)} = \text{diag}(\mathbf{D}_{11}^{(i)}, \dots, \mathbf{D}_{1p}^{(i)})$  with  $\mathbf{D}_{1j}^{(i)} = \left( \sum_{t \in \mathcal{T}_j^{(i)}} \boldsymbol{\phi}(t) \boldsymbol{\phi}(t)^\top / \sigma_j \right)$

136 and  $\mathbf{D}_2^{(i)} = (\mathbf{d}_{21}^{(i)\top}, \dots, \mathbf{d}_{2p}^{(i)\top})^\top$  with  $\mathbf{d}_{2j}^{(i)} = \left( \sum_{t \in \mathcal{T}_j^{(i)}} X_{jt}^{(i)} \phi(t) / \sigma_j \right)$ . Now we sample  $\tilde{\alpha}^{(i)}$  from  
 137  $N_{pS}(\mathbf{p}_\alpha^{(i)}, \mathbf{Q}_\alpha^{(i)-1})$  where,

$$\begin{aligned} \mathbf{Q}_\alpha^{(i)} &= (\mathbf{D}_1^{(i)} + \mathbf{L}^{(i)}) \\ \mathbf{p}_\alpha^{(i)} &= \mathbf{Q}_\alpha^{(i)-1} \left( \mathbf{D}_2^{(i)} + (\mathbf{I} - \tilde{\mathbf{B}})' \mathbf{T}^{(i)-1} \mathbf{M}^{(i)} \right) \end{aligned} \quad (19)$$

138 **Posterior distribution of the noise variances:** For each  $j \in [p]$ , update  $\sigma_j$  by sampling from  
 139  $\text{IG}(p_\sigma, q_\sigma)$  where,

$$\begin{aligned} p_\sigma &= a_\sigma + 1/2 \sum_{i=1}^n T_j^{(i)} \\ q_\sigma &= b_\sigma + 1/2 \sum_{i=1}^n \sum_{t \in \mathcal{T}_j^{(i)}} \left( X_{jt}^{(i)} - \tilde{\alpha}_j^{(i)\top} \phi(t) \right)^2 \end{aligned} \quad (20)$$

140 **Posterior distribution of the edge formation probability:** Update the edge probability  $r$  by  
 141 drawing from a  $\text{Beta}(p_r, q_r)$  distribution where,

$$\begin{aligned} p_r &= a_r + \sum_{j \neq \ell} E_{j\ell} \\ q_r &= b_r + \sum_{j \neq \ell} (1 - E_{j\ell}) \end{aligned} \quad (21)$$

142 **Posterior distribution of the causal effect size:** Update  $\gamma$  by drawing from a  $\text{IG}(p_\gamma, q_\gamma)$  where,

$$\begin{aligned} p_\gamma &= a_\gamma + K^2/2 \sum_{j \neq \ell} E_{j\ell} \\ q_\gamma &= b_\gamma + 1/2 \sum_{j \neq \ell} E_{j\ell} \text{trace}(\mathbf{B}_{j\ell}^\top \mathbf{B}_{j\ell}) \end{aligned} \quad (22)$$

143 **Posterior distribution of the coefficients of the bspline coefficients:** Define for each  $i \in [n], j \in$   
 144  $[p], k \in [S], \tilde{X}_{jt, -k}^{(i)} = X_{jt}^{(i)} - \sum_{\substack{h=1 \\ h \neq k}}^S \tilde{\alpha}_{jh}^{(i)} \phi_h(t)$ . For each  $k \in [S]$ , we draw  $\tilde{\mathbf{A}}_k^U$  from  $N_R(\mathbf{p}_k, \mathbf{Q}_k)$   
 145 where,

$$\begin{aligned} \mathbf{Q}_k &= \left[ \left\{ \sum_{i=1}^n \sum_{j=1}^p \frac{(\tilde{\alpha}_{jk}^{(i)})^2}{\sigma_j} \sum_{t \in \mathcal{T}_j^{(i)}} \mathbf{b}(t) \mathbf{b}(t)^\top \right\} + \mathbf{S}_k^{-1} \right]^{-1} \\ \mathbf{p}_k &= \mathbf{Q}_k \left[ \sum_{i=1}^n \sum_{j=1}^p \sum_{t \in \mathcal{T}_j^{(i)}} \frac{\tilde{\alpha}_{jk}^{(i)}}{\sigma_j} \tilde{X}_{jt, -k}^{(i)} \mathbf{b}(t) \right] \end{aligned} \quad (23)$$

146 Now, denote  $\mathbf{P}_k = \mathbf{J} \tilde{\mathbf{A}}_{-k}$ , where  $\mathbf{J} = \int \tilde{\mathbf{b}}(\omega) \tilde{\mathbf{b}}^\top(\omega) d\omega$ . Finally, transform and normalize the uncon-  
 147 strained sample to  $\tilde{\mathbf{A}}_k^N = \tilde{\mathbf{A}}_k^U - \mathbf{Q}_k \mathbf{P}_k (\mathbf{P}_k^\top \mathbf{Q}_k \mathbf{P}_k)^{-1} \mathbf{P}_k \tilde{\mathbf{A}}_k^U$  and  $\tilde{\mathbf{A}}_k = \tilde{\mathbf{A}}_k^N \times ([\tilde{\mathbf{A}}_k^N]^\top \mathbf{J} \tilde{\mathbf{A}}_k^N)^{-1/2}$ .

148 **Posterior distribution of the regularization parameter.** Independently for each  $k \in [S]$ , con-  
 149 ditional on all other parameters, denote  $q_k = 1/2 \sum_{r=3}^R \tilde{\mathbf{A}}_{kr}^2$  and  $p = R/2$ . We then draw each  $\lambda_k$   
 150 from a  $\text{Gamma}(p, q_k)$  distribution truncated at  $(L_k, U_k)$ .

151 **Posterior distribution of the adjacency and causal effect matrices.** Recursively for each  
152  $E_{j\ell}, j, \ell \in [p]$ , we perform a birth/death move such that  $\mathbf{E}' = \mathbf{E}$  except  $E'_{j\ell} = 1 - E_{j\ell}$ . The  
153 joint posterior of  $(\mathbf{B}_{j\ell}, E_{j\ell})$  does not have closed form expression and therefore we perform a  
154 Metropolis Hastings (MH) step for joint acceptance or rejection of  $(\mathbf{B}_{j\ell}, E_{j\ell})$ . First we draw a  $\mathbf{B}'_{j\ell}$   
155 from a proposal distribution  $N(\mathbf{B}_{j\ell}, z\mathbf{I}_K, \mathbf{I}_K)$ . We check whether  $\mathbf{B}' (= \mathbf{B}$  except for  $j, \ell$  block  
156 entry) satisfies the eigenvalue condition given in Assumption 2 of the main manuscript. If yes then  
157 we proceed to the next step and if not, we draw another  $\mathbf{B}'_{j\ell}$  from the proposal distribution. Here  $z$  is  
158 a tuning parameter for the MH step. Next we calculate the acceptance ratio( $\alpha$ ) =  $\alpha_N - \alpha_D$  where,

$$\alpha_N = E'_{j\ell} \log(rMVN(\mathbf{B}'_{j\ell}; \mathbf{B}_{j\ell}, \gamma\mathbf{I}_K, \mathbf{I}_K)) + (1 - E'_{j\ell}) \log((1 - r)MVN(\mathbf{B}'_{j\ell}; \mathbf{B}_{j\ell}, s\gamma\mathbf{I}_K, \mathbf{I}_K)) + \sum_{i=1}^n \log\left(N(\tilde{\alpha}^{(i)}; (\mathbf{I} - \tilde{\mathbf{B}}')^{-1}\mathbf{M}^{(i)}, (\mathbf{I} - \tilde{\mathbf{B}}')^\top \mathbf{T}^{(i)-1}(\mathbf{I} - \tilde{\mathbf{B}}'))\right) \quad (24)$$

159

$$\alpha_D = E_{j\ell} \log(rMVN(\mathbf{B}_{j\ell}; \mathbf{B}'_{j\ell}, \gamma\mathbf{I}_K, \mathbf{I}_K)) + (1 - E_{j\ell}) \log((1 - r)MVN(\mathbf{B}_{j\ell}; \mathbf{B}'_{j\ell}, s\gamma\mathbf{I}_K, \mathbf{I}_K)) + \sum_{i=1}^n \log\left(N(\tilde{\alpha}^{(i)}; (\mathbf{I} - \tilde{\mathbf{B}})^{-1}\mathbf{M}^{(i)}, (\mathbf{I} - \tilde{\mathbf{B}})^\top \mathbf{T}^{(i)-1}(\mathbf{I} - \tilde{\mathbf{B}}))\right) \quad (25)$$

160 Then we accept or reject the proposed  $(\mathbf{B}'_{j\ell}, E'_{j\ell})$  based on whether the value of a uniform random  
161 variable is less than or greater than  $\min\{1, \alpha\}$ . The value of  $z$  is tuned to achieve an acceptance rate  
162 between 20% to 40%.

### 163 B.3 Markov Chain Monte Carlo algorithm

164 In this section we delineate the steps of Markov Chain Monte Carlo algorithm for drawing samples  
165 from the posterior distributions.

---

#### Algorithm 1 MCMC algorithm to obtain posterior samples

---

```

1: for  $b \leftarrow 1$  to  $B$  do
2:   for  $i \leftarrow 1$  to  $n$  do
3:     Draw  $\tilde{\alpha}^{(i), [b]} \sim N_{pS}(\mathbf{p}_\alpha^{(i)}, (\mathbf{Q}_\alpha^{(i)})^{-1})$ ;           ▷ Update the basis coefficients by (19)
4:   end for
5: end for
6: for  $j \leftarrow 1$  to  $p$  do
7:   Draw  $\sigma_j^{[b]}$  from  $IG(p_\sigma, q_\sigma)$ ;                               ▷ Update the noise variances by (20)
8: end for
9: Draw  $r^{[b]}$  from  $Beta(p_r, q_r)$ ;                                   ▷ Update the edge formation probability by (21)
10: Draw  $\gamma^{[b]}$  from  $IG(p_\gamma, q_\gamma)$ ;                                 ▷ Update the causal effect size by (22)
11: for  $k \leftarrow 1$  to  $S$  do
12:   Draw  $\tilde{\mathbf{A}}_k^U \sim N_R(\mathbf{p}_k, \mathbf{Q}_k)$ ;                                   ▷ Update the un-normalized bspline coefficients by (23)
13:   Calculate  $\mathbf{P}_k = \mathbf{J}\tilde{\mathbf{A}}_{-k}$ ;
14:   Calculate  $\tilde{\mathbf{A}}_k^N = \tilde{\mathbf{A}}_k^U - \mathbf{Q}_k\mathbf{P}_k(\mathbf{P}_k^\top\mathbf{Q}_k\mathbf{P}_k)^{-1}\mathbf{P}_k\tilde{\mathbf{A}}_k^U$ ;
15:   Normalize  $\tilde{\mathbf{A}}_k^{[b]} = \tilde{\mathbf{A}}_k^N \times ([\tilde{\mathbf{A}}_k^N]^\top \mathbf{J}\tilde{\mathbf{A}}_k^N)^{-1/2}$ ;
16: end for
17: for  $k \leftarrow 1$  to  $S$  do
18:   Draw  $\lambda_k^{[b]} \sim \text{Gamma}\left(\frac{R}{2}, \frac{\sum_{r=3}^R (\tilde{\mathbf{A}}_{kr}^{[b]})^2}{2}\right)$ ;           ▷ Update the regularization parameter
19: end for

```

---

---

```

20: for  $j \leftarrow 1$  to  $p$  do
21:   for  $k \leftarrow 1$  to  $K$  do
22:     Draw  $\pi_{jk}^{[b]} \sim \text{Dir}(\beta_1, \dots, \beta_M)$  ▷ Update the mixing weights by (15)
23:     for  $i \leftarrow 1$  to  $n$  do
24:       Draw  $\xi_{jk}^{(i), [b]} \sim \text{Cat}(\{\pi_m^{(i), [b]}\}_{m \in [M]})$ ; ▷ Update the class labels by (16)
25:     end for
26:   end for
27: end for
28: for  $j \leftarrow 1$  to  $p$  do
29:   for  $k \leftarrow 1$  to  $K$  do
30:     for  $m \leftarrow 1$  to  $M$  do
31:       Draw  $\mu_{jkm}^{[b]} \sim \text{N}(p_{jkm}, q_{jkm}^{-1})$ ; ▷ Update the mean parameter by (17)
32:       Draw  $\tau_{jkm}^{[b]} \sim \text{IG}(p'_{jkm}, q'_{jkm})$ ; ▷ Update the variance parameter by (18)
33:     end for
34:   end for
35: end for
36: for  $j \leftarrow 1$  to  $p$  do
37:   for  $\ell \leftarrow 1$  to  $p$  do
38:     Update  $(E_{j\ell}, \mathbf{B}_{j\ell})$  by MH step using (25) and (24)
39:   end for
40: end for

```

---

## 166 C Some additional simulations

### 167 C.1 Misspecification analysis of the proposed model

#### 168 C.1.1 With general exogenous variable distributions

169 In this section we consider simulating the exogenous variable from distributions other than that of  
170 laplace distribution and compare the performance of our algorithm. In particular, following Shimizu  
171 et al., 2011, we generate the exogenous variable  $\epsilon_{jk}$  from (1) Student t distribution with 1 degrees  
172 of freedom, (2) Uniform (3) Exponential, (4) Mixture of two double exponentials, (5) Symmetric  
173 mixture of four Gaussians, and (6) Non symmetric mixture of two Gaussians. Across all exogenous  
174 variable distributions, Table 1 shows that the proposed FENCE model had the best performance.

Table 1: Table showing comparison of several methods for different distributions of exogenous variables  $\epsilon_{jk}$  under 50 replicates

| Distributions | FENCE      |            |            | fLING      |            |            | fPCA-LINGAM |            |            | fPCA-PC    |            |            | fPCA-CCD   |            |            |
|---------------|------------|------------|------------|------------|------------|------------|-------------|------------|------------|------------|------------|------------|------------|------------|------------|
|               | TPR        | FDR        | MCC        | TPR        | FDR        | MCC        | TPR         | FDR        | MCC        | TPR        | FDR        | MCC        | TPR        | FDR        | MCC        |
| (1)           | 0.81(0.04) | 0.24(0.07) | 0.76(0.05) | 0.71(0.09) | 0.69(0.05) | 0.36(0.04) | 0.85(0.02)  | 0.84(0.04) | 0.28(0.08) | 0.81(0.05) | 0.71(0.06) | 0.26(0.07) | 0.91(0.02) | 0.62(0.04) | 0.38(0.02) |
| (2)           | 0.75(0.04) | 0.21(0.03) | 0.86(0.04) | 0.73(0.04) | 0.68(0.04) | 0.33(0.07) | 0.82(0.06)  | 0.76(0.04) | 0.26(0.02) | 0.83(0.06) | 0.67(0.04) | 0.30(0.05) | 0.87(0.02) | 0.69(0.05) | 0.35(0.04) |
| (3)           | 0.77(0.04) | 0.23(0.05) | 0.83(0.04) | 0.74(0.04) | 0.63(0.03) | 0.32(0.04) | 0.86(0.04)  | 0.81(0.03) | 0.24(0.03) | 0.81(0.03) | 0.76(0.03) | 0.31(0.03) | 0.89(0.02) | 0.73(0.05) | 0.41(0.03) |
| (4)           | 0.88(0.07) | 0.14(0.06) | 0.89(0.05) | 0.67(0.07) | 0.75(0.06) | 0.29(0.05) | 0.81(0.02)  | 0.79(0.05) | 0.22(0.09) | 0.82(0.08) | 0.75(0.04) | 0.27(0.05) | 0.83(0.03) | 0.58(0.03) | 0.43(0.03) |
| (5)           | 0.81(0.07) | 0.21(0.06) | 0.87(0.05) | 0.69(0.06) | 0.71(0.05) | 0.25(0.04) | 0.84(0.03)  | 0.76(0.02) | 0.25(0.06) | 0.80(0.07) | 0.73(0.05) | 0.29(0.03) | 0.86(0.04) | 0.67(0.05) | 0.36(0.02) |
| (6)           | 0.79(0.06) | 0.24(0.05) | 0.81(0.04) | 0.70(0.04) | 0.71(0.06) | 0.28(0.05) | 0.82(0.04)  | 0.73(0.05) | 0.31(0.03) | 0.83(0.07) | 0.71(0.05) | 0.25(0.03) | 0.78(0.02) | 0.68(0.04) | 0.39(0.05) |

#### 175 C.1.2 With functions observed on unevenly spaced grids

176 In this experiment, we generated simulated data with  $(n, p)$  values of either  $(500, 20)$ ,  $(500, 50)$ ,  
177  $(800, 20)$ , or  $(800, 50)$ . Unlike the method used in Section 4 of the main manuscript, we initially  
178 selected 250 points at random from the uniform distribution between 0 and 1 and defined this set as  
179  $D$ . For each realization  $i$  of function  $j$ , we randomly selected a subset  $D_j^{(i)}$  of size  $m_j^{(i)} = 20$  from  
180  $D$  to measure the function. We generated the causal graph, direct causal effect matrix, orthonormal  
181 basis functions, basis coefficient sequences, and observations in the same way as Section 4 of the  
182 main manuscript. We conducted this scenario 50 times and compared the results with those from  
183 fLING, fPCA-LINGAM, fPCA-PC and fPCA-CCD. The results presented in Table 2 demonstrate  
184 that FENCE is effective and superior to these other methods in learning directed cyclic graphs for  
185 general multivariate functional data.



Table 2: Comparison of various methods under unevenly specified grids under 50 replicates

| n   | p  | FENCE      |            |            | fLiNG      |            |            | fPCA-LiNGAM |            |            | fPCA-PC    |            |            | fPCA-CCD   |            |            |
|-----|----|------------|------------|------------|------------|------------|------------|-------------|------------|------------|------------|------------|------------|------------|------------|------------|
|     |    | TPR        | FDR        | MCC        | TPR        | FDR        | MCC        | TPR         | FDR        | MCC        | TPR        | FDR        | MCC        | TPR        | FDR        | MCC        |
| 500 | 20 | 0.86(0.03) | 0.19(0.05) | 0.89(0.05) | 0.46(0.09) | 0.73(0.05) | 0.32(0.03) | 0.25(0.02)  | 0.82(0.04) | 0.17(0.04) | 0.21(0.04) | 0.83(0.04) | 0.19(0.07) | 0.56(0.02) | 0.62(0.05) | 0.32(0.06) |
| 500 | 50 | 0.79(0.04) | 0.24(0.06) | 0.84(0.04) | 0.37(0.04) | 0.79(0.06) | 0.29(0.05) | 0.23(0.04)  | 0.87(0.03) | 0.15(0.02) | 0.17(0.06) | 0.85(0.04) | 0.17(0.05) | 0.51(0.05) | 0.67(0.03) | 0.27(0.01) |
| 800 | 20 | 0.91(0.04) | 0.16(0.03) | 0.91(0.04) | 0.61(0.07) | 0.79(0.06) | 0.41(0.04) | 0.33(0.03)  | 0.79(0.05) | 0.25(0.02) | 0.35(0.03) | 0.81(0.02) | 0.31(0.03) | 0.78(0.02) | 0.56(0.01) | 0.39(0.03) |
| 800 | 50 | 0.88(0.07) | 0.20(0.04) | 0.88(0.05) | 0.55(0.03) | 0.81(0.02) | 0.38(0.05) | 0.27(0.02)  | 0.86(0.05) | 0.22(0.09) | 0.31(0.06) | 0.82(0.04) | 0.29(0.05) | 0.73(0.03) | 0.64(0.04) | 0.36(0.05) |

186 **C.1.3 When the true graph is acyclic**

187 In this section we compared our method with the fLiNG method under the assumption that the true  
 188 graph is acyclic. The entire simulation setting remains same as that of described in Section 4 of the  
 189 main manuscript except that the true graph was generated under acyclicity constraint. It is observed  
 190 from Table 3 that under this assumption, fLiNG has superior performance against the proposed  
 191 FENCE model.

Table 3: Comparison of two methods when the true graph is acyclic under 50 replicates

| n   | p  | d   | FENCE      |            |            | fLiNG      |            |            |
|-----|----|-----|------------|------------|------------|------------|------------|------------|
|     |    |     | TPR        | FDR        | MCC        | TPR        | FDR        | MCC        |
| 150 | 30 | 125 | 0.81(0.03) | 0.29(0.05) | 0.85(0.05) | 0.83(0.05) | 0.21(0.05) | 0.91(0.04) |
| 150 | 60 | 125 | 0.79(0.04) | 0.32(0.06) | 0.81(0.02) | 0.82(0.03) | 0.24(0.06) | 0.87(0.05) |
| 150 | 30 | 250 | 0.67(0.05) | 0.34(0.06) | 0.79(0.04) | 0.81(0.04) | 0.23(0.06) | 0.82(0.05) |
| 150 | 60 | 250 | 0.64(0.04) | 0.36(0.03) | 0.74(0.04) | 0.78(0.05) | 0.26(0.06) | 0.79(0.05) |
| 300 | 30 | 125 | 0.85(0.03) | 0.23(0.05) | 0.87(0.04) | 0.79(0.05) | 0.19(0.06) | 0.93(0.04) |
| 300 | 60 | 125 | 0.81(0.04) | 0.26(0.05) | 0.81(0.08) | 0.85(0.02) | 0.21(0.05) | 0.87(0.04) |
| 300 | 30 | 250 | 0.77(0.02) | 0.31(0.06) | 0.81(0.05) | 0.78(0.03) | 0.23(0.06) | 0.85(0.05) |
| 300 | 60 | 250 | 0.75(0.03) | 0.35(0.04) | 0.79(0.05) | 0.82(0.03) | 0.24(0.05) | 0.80(0.05) |

192 **C.1.4 When the true structural equation model is non-linear**

193 In this section, we have outlined the misspecification analysis for our model by generating data  
 194 corresponding to a non-linear structural equation model (SEM). We have considered a scenario with  
 195 number of samples( $n$ ) = 100, number of nodes( $p$ ) = 6 and evenly spaced time grid( $d$ ) over  $(0, 1)$   
 196 of size  $d = 100$ . The summary measures corresponding to 10 replicates are given in Table 4 below.  
 197 The poor performance is clearly expected because our modeling assumptions involve linear SEM.

Table 4: Performance of FENCE when the true SEM is non-linear

| FENCE      |            |            |
|------------|------------|------------|
| TPR        | FDR        | MCC        |
| 0.27(0.08) | 0.71(0.07) | 0.34(0.07) |

198 **C.2 Sensitivity analysis**

199 In this section, we outline how sensitive the performance of our model is against different choices of  
 200 hyperparameters. The hyperparameters for our model are  $(a_\gamma, b_\gamma), (a_\tau, b_\tau), (a_\sigma, b_\sigma), s, R, S, M$  and  
 201  $\beta$ . The data were generated the same way as in Section 4 of the main manuscript with  $(n, p, d) =$   
 202  $(150, 20, 125)$ . From Table 5 we can conclude that the performance of our model is quite robust  
 203 under different choice of hyperparameters.

204 **D Comparison of various methods**

205 In this section, as discussed in Section 4 of the main manuscript, we give the full summary of the  
 206 simulation results related to the comparison of our method, FENCE, against fLiNG, fPCA-LiNGAM,  
 207 fPCA-PC and fPCA-CCD in Table 6. Our conclusions remain the same.

Table 5: Sensitivity analysis for different choices of hyperparameters. The metrics reported are based on 50 repetitions are reported; standard deviations are given within the parentheses.

| Hyperparameters | $(a_\tau, b_\tau) = (0.1, 0.1)$ | $(a_\sigma, b_\sigma) = (0.1, 0.1)$   | $(a_\gamma, b_\gamma) = (0.1, 0.1)$ | $s = 0.01$ | $R = 30$   | $S = 15$   | $M = 15$   | $\beta = 0.1$ |
|-----------------|---------------------------------|---------------------------------------|-------------------------------------|------------|------------|------------|------------|---------------|
| TPR             | 0.79(0.02)                      | 0.80(0.02)                            | 0.78(0.03)                          | 0.75(0.03) | 0.79(0.02) | 0.80(0.01) | 0.81(0.02) | 0.82(0.02)    |
| FDR             | 0.16(0.03)                      | 0.18(0.03)                            | 0.18(0.05)                          | 0.20(0.04) | 0.23(0.02) | 0.19(0.03) | 0.15(0.03) | 0.21(0.02)    |
| MCC             | 0.76(0.04)                      | 0.81(0.04)                            | 0.83(0.04)                          | 0.82(0.03) | 0.81(0.01) | 0.84(0.04) | 0.83(0.01) | 0.84(0.03)    |
| Hyperparameters | $(a_\tau, b_\tau) = (0.1, 1)$   | $(a_\sigma, b_\sigma) = (0.01, 0.01)$ | $(a_\gamma, b_\gamma) = (0.1, 1)$   | $s = 0.03$ | $R = 20$   | $S = 10$   | $M = 20$   | $\beta = 2$   |
| TPR             | 0.80(0.02)                      | 0.79(0.03)                            | 0.76(0.02)                          | 0.75(0.03) | 0.78(0.03) | 0.79(0.02) | 0.82(0.04) | 0.81(0.03)    |
| FDR             | 0.17(0.03)                      | 0.18(0.04)                            | 0.15(0.03)                          | 0.19(0.04) | 0.22(0.03) | 0.21(0.03) | 0.15(0.03) | 0.23(0.03)    |
| MCC             | 0.77(0.02)                      | 0.80(0.02)                            | 0.82(0.02)                          | 0.82(0.03) | 0.80(0.02) | 0.83(0.03) | 0.83(0.03) | 0.85(0.05)    |
| Hyperparameters | $(a_\tau, b_\tau) = (5, 1)$     | $(a_\sigma, b_\sigma) = (0.1, 1)$     | $(a_\gamma, b_\gamma) = (5, 1)$     | $s = 0.05$ | $R = 25$   | $S = 20$   | $M = 30$   | $\beta = 5$   |
| TPR             | 0.76(0.04)                      | 0.82(0.05)                            | 0.79(0.03)                          | 0.76(0.04) | 0.78(0.03) | 0.80(0.03) | 0.81(0.02) | 0.79(0.04)    |
| FDR             | 0.17(0.05)                      | 0.19(0.04)                            | 0.19(0.02)                          | 0.20(0.03) | 0.23(0.03) | 0.22(0.04) | 0.16(0.03) | 0.21(0.03)    |
| MCC             | 0.78(0.02)                      | 0.83(0.03)                            | 0.83(0.05)                          | 0.81(0.03) | 0.81(0.01) | 0.84(0.01) | 0.82(0.02) | 0.83(0.03)    |

Table 6: Comparison of performance of various methods under 50 replicates. Since LiNGAM is not applicable to cases where  $q > n$  with  $q = Kp$  being the total number of extracted basis coefficients across all functions, the results from those cases are not available and indicated by "-".

| n   | p  | d   | FENCE             |                   |                   | fLiNG             |            |            | iPCA-LINGAM |            |            | iPCA-PC    |            |            | iPCA-CCD   |            |            |
|-----|----|-----|-------------------|-------------------|-------------------|-------------------|------------|------------|-------------|------------|------------|------------|------------|------------|------------|------------|------------|
|     |    |     | TPR               | FDR               | MCC               | TPR               | FDR        | MCC        | TPR         | FDR        | MCC        | TPR        | FDR        | MCC        | TPR        | FDR        | MCC        |
| 75  | 20 | 125 | <b>0.85(0.09)</b> | <b>0.19(0.07)</b> | <b>0.88(0.05)</b> | 0.41(0.09)        | 0.79(0.05) | 0.36(0.04) | 0.35(0.19)  | 0.84(0.04) | 0.11(0.08) | 0.20(0.09) | 0.83(0.06) | 0.10(0.07) | 0.69(0.03) | 0.41(0.04) | 0.23(0.03) |
| 75  | 40 | 125 | <b>0.79(0.08)</b> | <b>0.23(0.06)</b> | <b>0.86(0.04)</b> | 0.37(0.08)        | 0.82(0.06) | 0.33(0.05) | -           | -          | -          | 0.11(0.06) | 0.91(0.04) | 0.05(0.05) | 0.73(0.02) | 0.47(0.04) | 0.21(0.05) |
| 75  | 60 | 125 | <b>0.75(0.07)</b> | <b>0.27(0.05)</b> | <b>0.83(0.04)</b> | 0.34(0.07)        | 0.83(0.06) | 0.32(0.04) | -           | -          | -          | 0.11(0.03) | 0.91(0.03) | 0.06(0.03) | 0.68(0.03) | 0.61(0.05) | 0.19(0.03) |
| 150 | 20 | 125 | <b>0.88(0.07)</b> | <b>0.14(0.06)</b> | <b>0.89(0.05)</b> | 0.45(0.07)        | 0.75(0.06) | 0.39(0.05) | 0.28(0.22)  | 0.86(0.05) | 0.08(0.09) | 0.31(0.08) | 0.75(0.04) | 0.12(0.05) | 0.71(0.03) | 0.42(0.03) | 0.25(0.04) |
| 150 | 40 | 125 | <b>0.81(0.07)</b> | <b>0.21(0.06)</b> | <b>0.87(0.05)</b> | 0.39(0.06)        | 0.79(0.05) | 0.37(0.04) | 0.35(0.22)  | 0.91(0.02) | 0.08(0.06) | 0.25(0.07) | 0.81(0.05) | 0.06(0.03) | 0.73(0.04) | 0.47(0.05) | 0.23(0.03) |
| 150 | 60 | 125 | <b>0.79(0.06)</b> | <b>0.24(0.05)</b> | <b>0.86(0.04)</b> | 0.36(0.04)        | 0.80(0.06) | 0.36(0.05) | -           | -          | -          | 0.23(0.07) | 0.83(0.05) | 0.05(0.03) | 0.72(0.05) | 0.54(0.04) | 0.22(0.02) |
| 300 | 20 | 125 | <b>0.91(0.03)</b> | <b>0.09(0.04)</b> | <b>0.90(0.04)</b> | 0.51(0.04)        | 0.73(0.06) | 0.41(0.04) | 0.30(0.19)  | 0.84(0.05) | 0.11(0.09) | 0.36(0.09) | 0.72(0.05) | 0.14(0.05) | 0.81(0.03) | 0.39(0.04) | 0.26(0.03) |
| 300 | 40 | 125 | <b>0.87(0.04)</b> | <b>0.15(0.05)</b> | <b>0.87(0.05)</b> | 0.47(0.05)        | 0.75(0.06) | 0.38(0.05) | 0.27(0.20)  | 0.91(0.02) | 0.08(0.06) | 0.29(0.06) | 0.76(0.06) | 0.07(0.03) | 0.77(0.03) | 0.45(0.02) | 0.24(0.03) |
| 300 | 60 | 125 | <b>0.85(0.05)</b> | <b>0.17(0.03)</b> | <b>0.86(0.03)</b> | 0.45(0.05)        | 0.76(0.04) | 0.38(0.03) | 0.28(0.17)  | 0.91(0.05) | 0.07(0.06) | 0.28(0.04) | 0.77(0.05) | 0.05(0.03) | 0.72(0.03) | 0.49(0.02) | 0.22(0.03) |
| 75  | 20 | 250 | <b>0.81(0.04)</b> | <b>0.23(0.02)</b> | <b>0.85(0.05)</b> | 0.39(0.07)        | 0.80(0.05) | 0.39(0.04) | 0.32(0.14)  | 0.82(0.03) | 0.09(0.04) | 0.19(0.07) | 0.81(0.04) | 0.13(0.07) | 0.67(0.03) | 0.46(0.03) | 0.22(0.04) |
| 75  | 40 | 250 | <b>0.73(0.04)</b> | <b>0.28(0.05)</b> | <b>0.82(0.04)</b> | 0.35(0.04)        | 0.85(0.06) | 0.33(0.05) | -           | -          | -          | 0.25(0.06) | 0.83(0.04) | 0.12(0.04) | 0.68(0.02) | 0.51(0.04) | 0.21(0.03) |
| 75  | 60 | 250 | <b>0.67(0.03)</b> | <b>0.34(0.05)</b> | <b>0.79(0.04)</b> | 0.34(0.04)        | 0.85(0.03) | 0.31(0.04) | -           | -          | -          | 0.17(0.03) | 0.83(0.02) | 0.09(0.03) | 0.63(0.04) | 0.56(0.04) | 0.19(0.04) |
| 150 | 20 | 250 | <b>0.83(0.06)</b> | <b>0.17(0.05)</b> | <b>0.86(0.05)</b> | 0.46(0.07)        | 0.73(0.07) | 0.42(0.05) | 0.32(0.19)  | 0.79(0.05) | 0.13(0.05) | 0.41(0.08) | 0.72(0.04) | 0.19(0.05) | 0.73(0.04) | 0.43(0.02) | 0.24(0.03) |
| 150 | 40 | 250 | <b>0.79(0.02)</b> | <b>0.26(0.06)</b> | <b>0.82(0.03)</b> | 0.41(0.05)        | 0.71(0.05) | 0.40(0.03) | 0.31(0.14)  | 0.81(0.02) | 0.13(0.06) | 0.46(0.07) | 0.73(0.05) | 0.15(0.02) | 0.71(0.03) | 0.47(0.04) | 0.23(0.03) |
| 150 | 60 | 250 | <b>0.69(0.05)</b> | <b>0.31(0.05)</b> | <b>0.79(0.04)</b> | 0.43(0.03)        | 0.79(0.06) | 0.43(0.05) | -           | -          | -          | 0.41(0.03) | 0.75(0.05) | 0.14(0.03) | 0.69(0.02) | 0.52(0.03) | 0.21(0.02) |
| 300 | 20 | 250 | <b>0.86(0.02)</b> | <b>0.16(0.04)</b> | <b>0.85(0.04)</b> | 0.68(0.02)        | 0.77(0.07) | 0.47(0.04) | 0.45(0.13)  | 0.86(0.05) | 0.17(0.09) | 0.42(0.09) | 0.86(0.03) | 0.13(0.05) | 0.78(0.02) | 0.44(0.06) | 0.27(0.03) |
| 300 | 40 | 250 | <b>0.79(0.08)</b> | <b>0.16(0.05)</b> | <b>0.84(0.06)</b> | 0.73(0.05)        | 0.71(0.06) | 0.43(0.05) | 0.39(0.16)  | 0.87(0.05) | 0.16(0.07) | 0.45(0.06) | 0.81(0.06) | 0.12(0.06) | 0.76(0.05) | 0.49(0.06) | 0.23(0.05) |
| 300 | 60 | 250 | 0.76(0.05)        | <b>0.21(0.03)</b> | <b>0.80(0.03)</b> | <b>0.77(0.05)</b> | 0.74(0.03) | 0.42(0.03) | 0.28(0.17)  | 0.90(0.04) | 0.13(0.04) | 0.43(0.04) | 0.79(0.07) | 0.12(0.04) | 0.72(0.06) | 0.53(0.03) | 0.22(0.04) |

## 208 References

- 209 Daniel R Kowal, David S Matteson, and David Ruppert. A bayesian multivariate functional dynamic  
210 linear model. *Journal of the American Statistical Association*, 112(518):733–744, 2017.
- 211 Shohei Shimizu, Takanori Inazumi, Yasuhiro Sogawa, Aapo Hyvärinen, Y. Kawahara, Takashi  
212 Washio, Patrik O. Hoyer, and Kenneth A. Bollen. Directlingam: A direct method for learning a  
213 linear non-gaussian structural equation model. *J. Mach. Learn. Res.*, 12:1225–1248, 2011.
- 214 Henry Teicher. Identifiability of Finite Mixtures. *The Annals of Mathematical Statistics*, 34(4):  
215 1265 – 1269, 1963. doi: 10.1214/aoms/1177703862. URL [https://doi.org/10.1214/aoms/  
216 1177703862](https://doi.org/10.1214/aoms/1177703862).
- 217 Sumio Watanabe. A widely applicable bayesian information criterion. *J. Mach. Learn. Res.*, 14(1):  
218 867–897, mar 2013. ISSN 1532-4435.
- 219 Sidney J. Yakowitz and John D. Spragins. On the Identifiability of Finite Mixtures. *The Annals  
220 of Mathematical Statistics*, 39(1):209 – 214, 1968. doi: 10.1214/aoms/1177698520. URL  
221 <https://doi.org/10.1214/aoms/1177698520>.
- 222 Fangting Zhou, Kejun He, Kunbo Wang, Yanxun Xu, and Yang Ni. Functional bayesian networks for  
223 discovering causality from multivariate functional data, 2022.
